# Supplementary material
Source: HighWire-hosted journal article supplement (https://emboj.embopress.org/content/embj.201593084/F8)

Source Data Figure 5

5A)

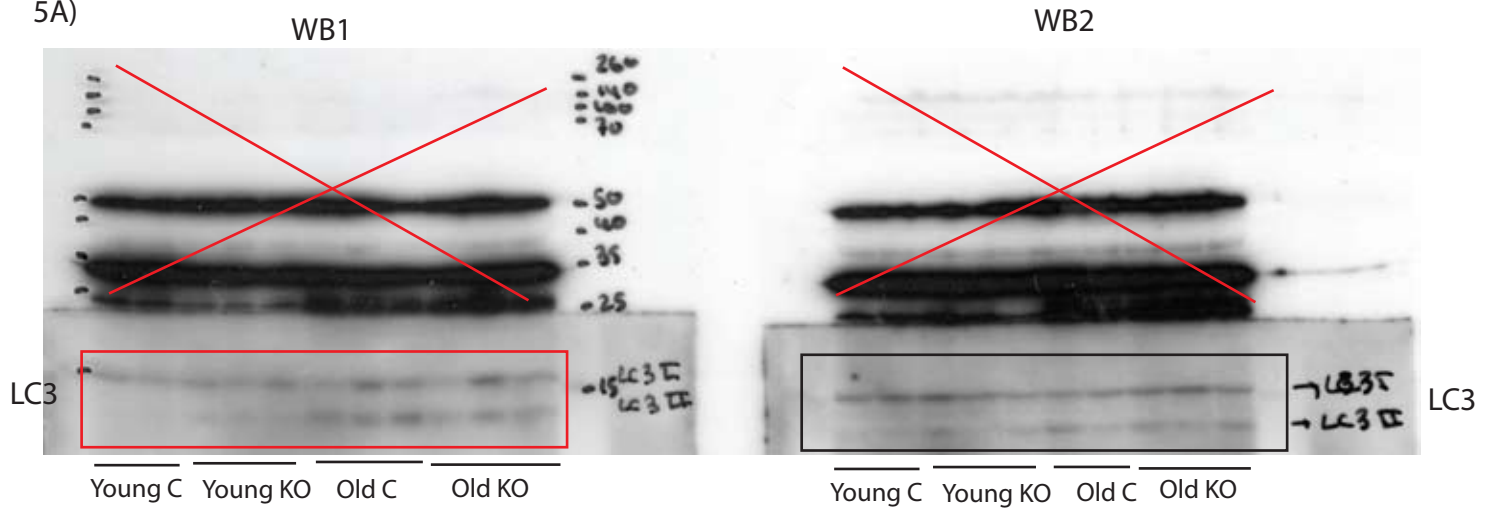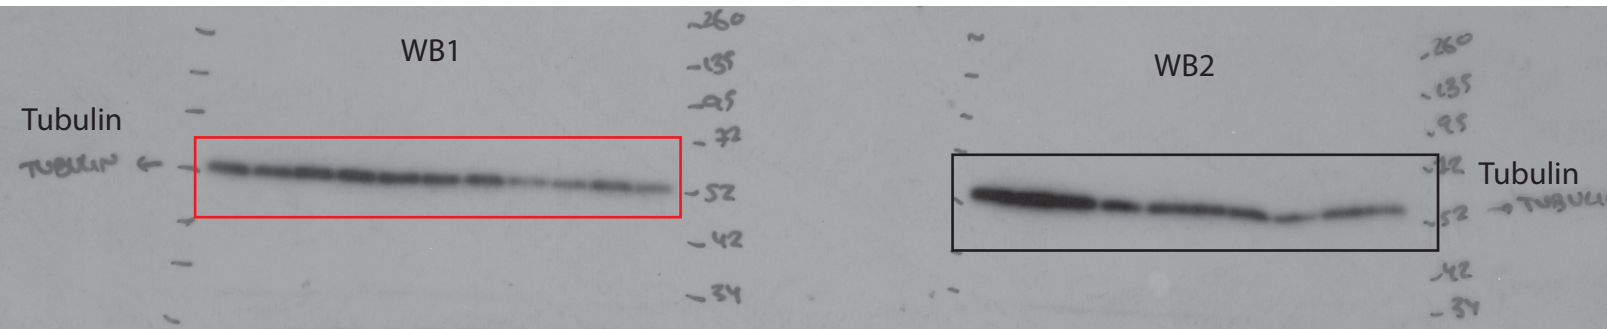

5B)

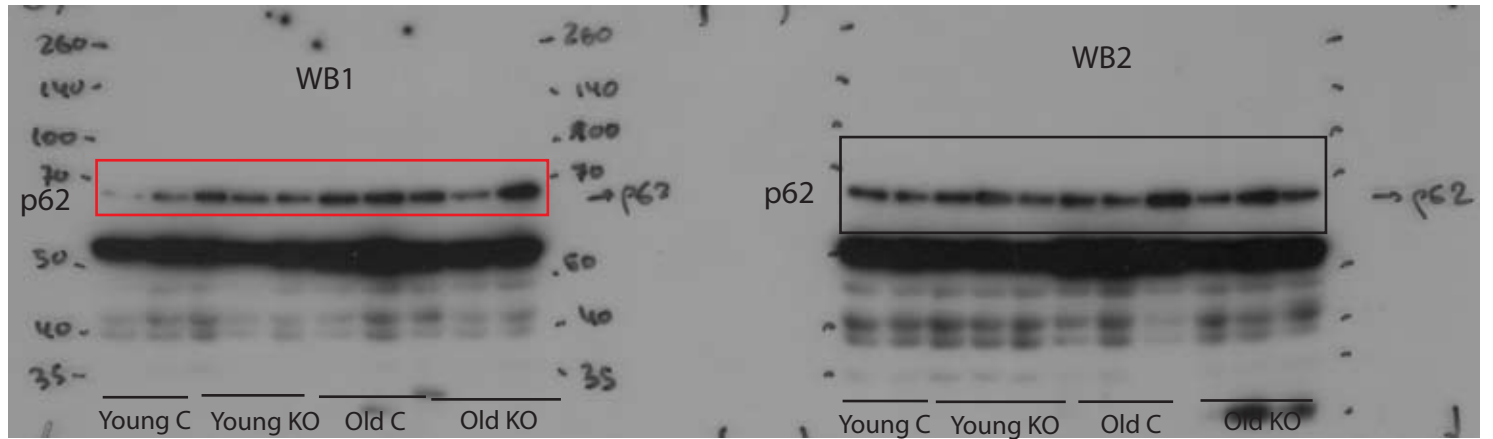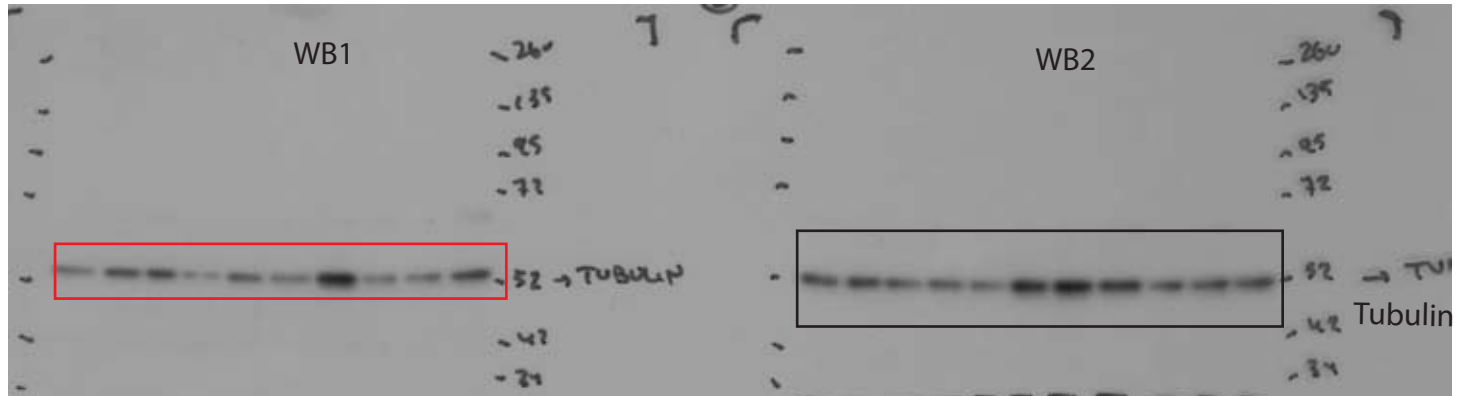

Source Data Figure 5

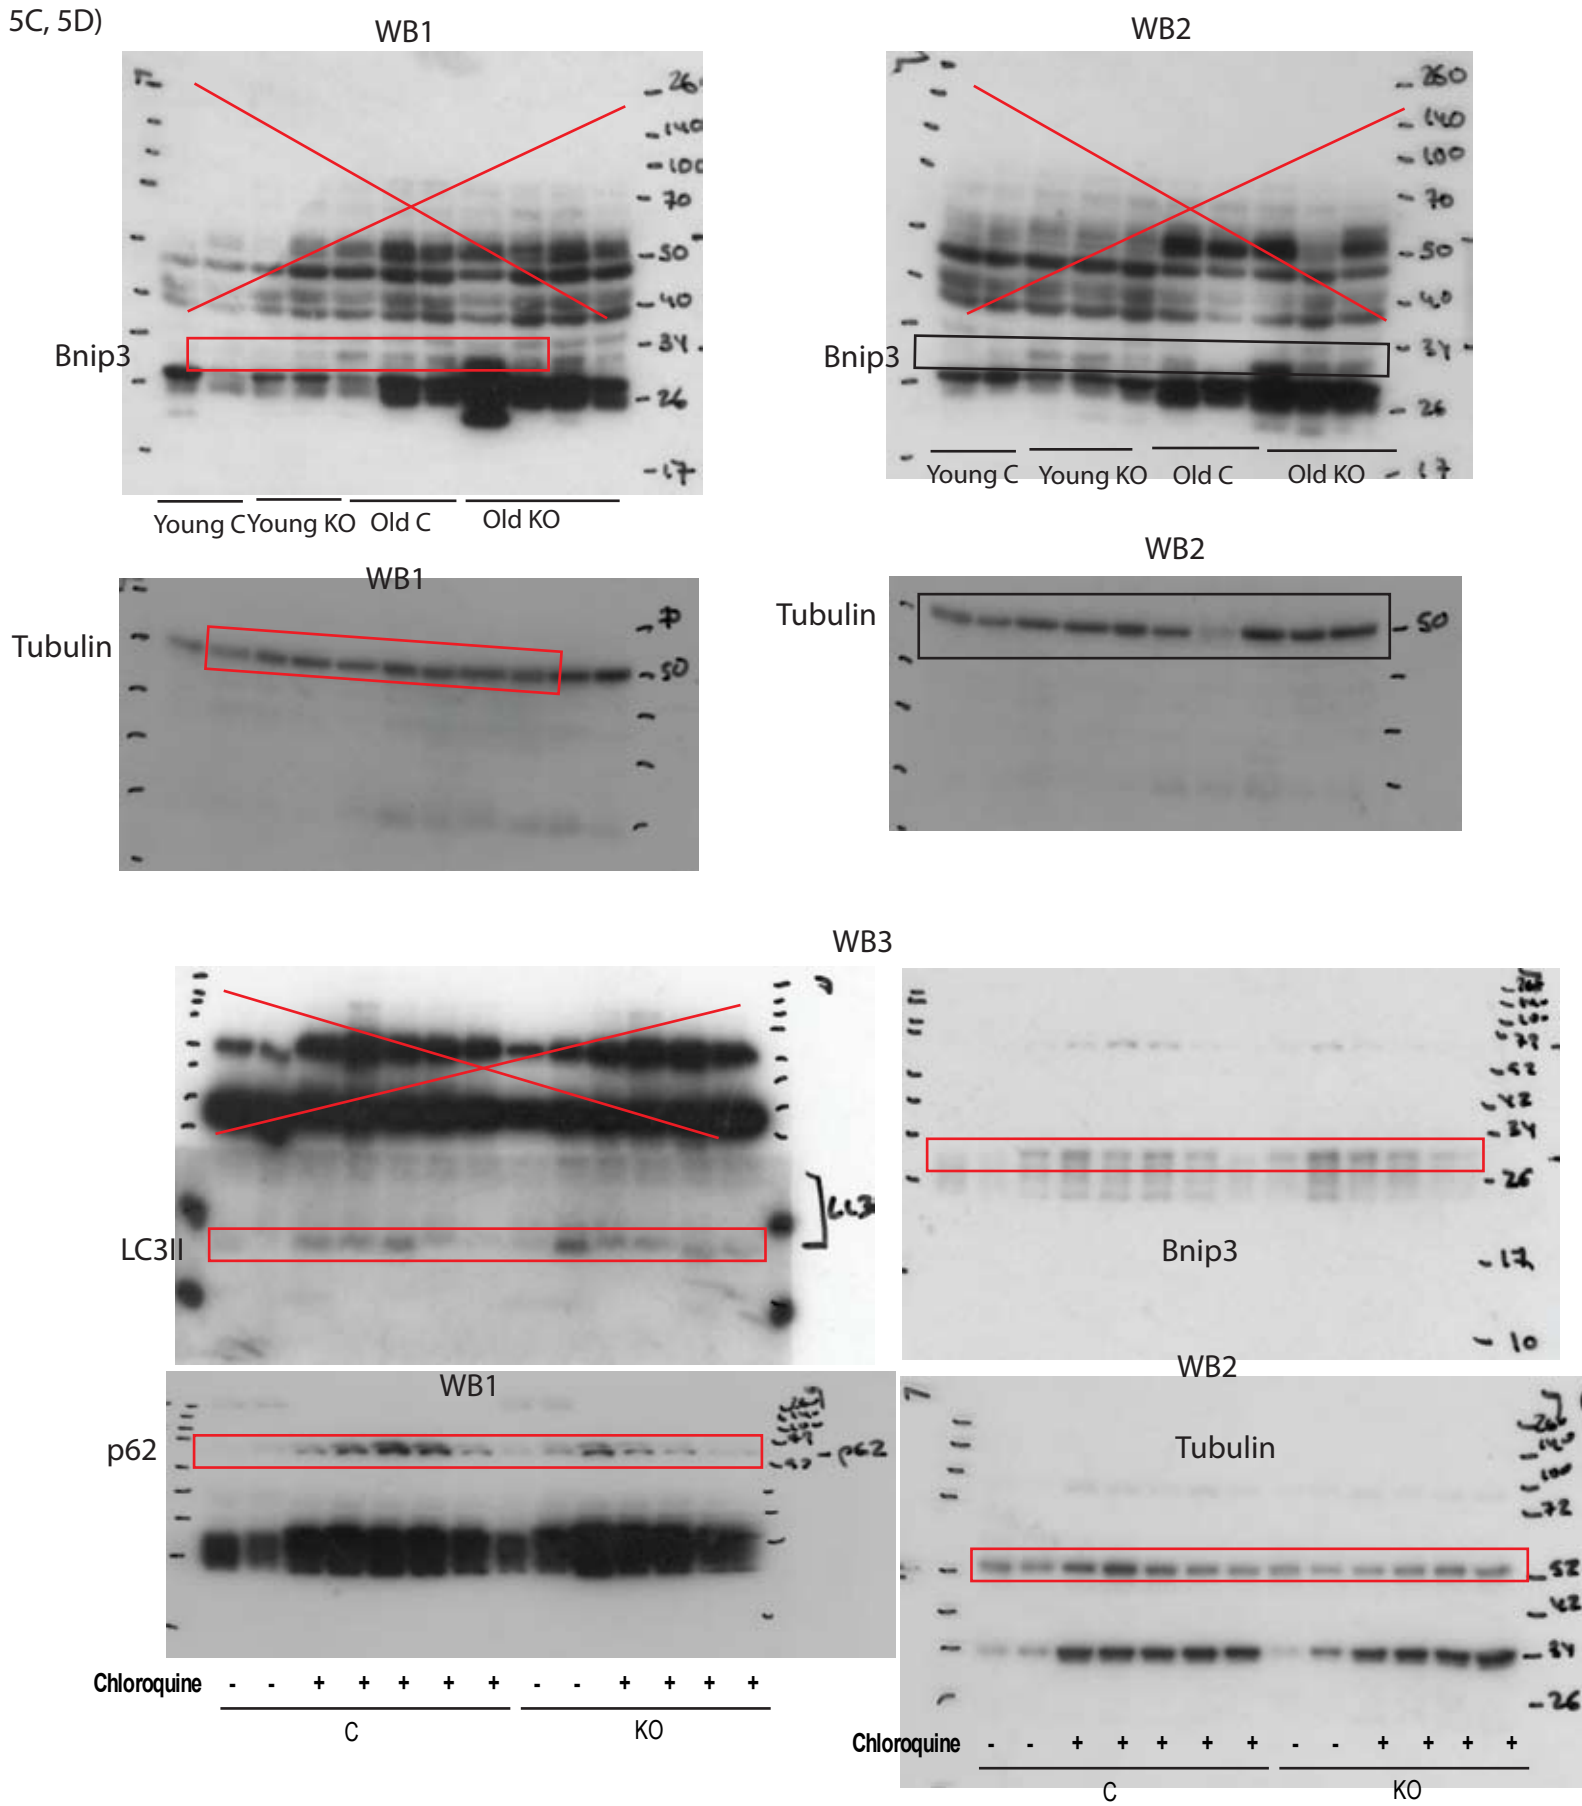

Source Data Figure 5

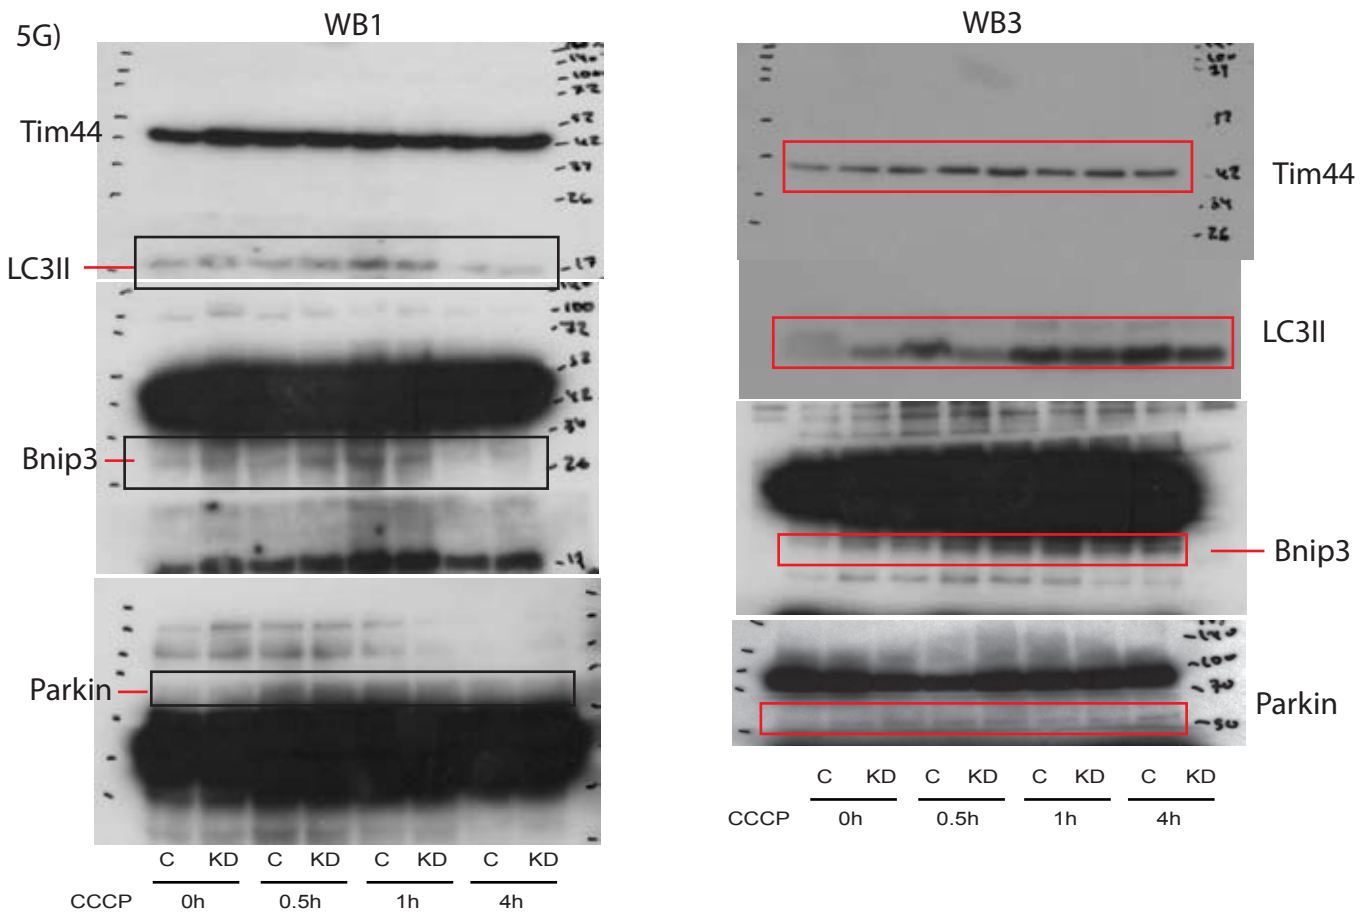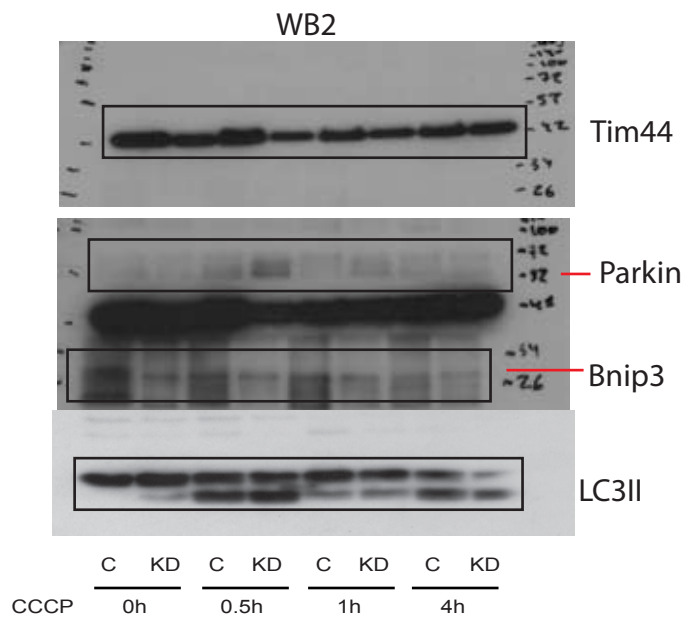

Supplement: inline-supplementary-material-3 [file inline-supplementary-material-3.pdf]
